# Supplementary material for: The MADS-domain protein MPF1 of Physalis floridana controls plant architecture, seed development and flowering time
Source: PubMed Central journal article supplement — Planta. 2009 Dec 24;231(3):767–77. doi: 10.1007/s00425-009-1087-z (PMC2806528; doi:10.1007/s00425-009-1087-z), 2009-12-24
Supplement: 425_2009_1087_MOESM1_ESM.pdf [file 425_2009_1087_MOESM1_ESM.pdf]

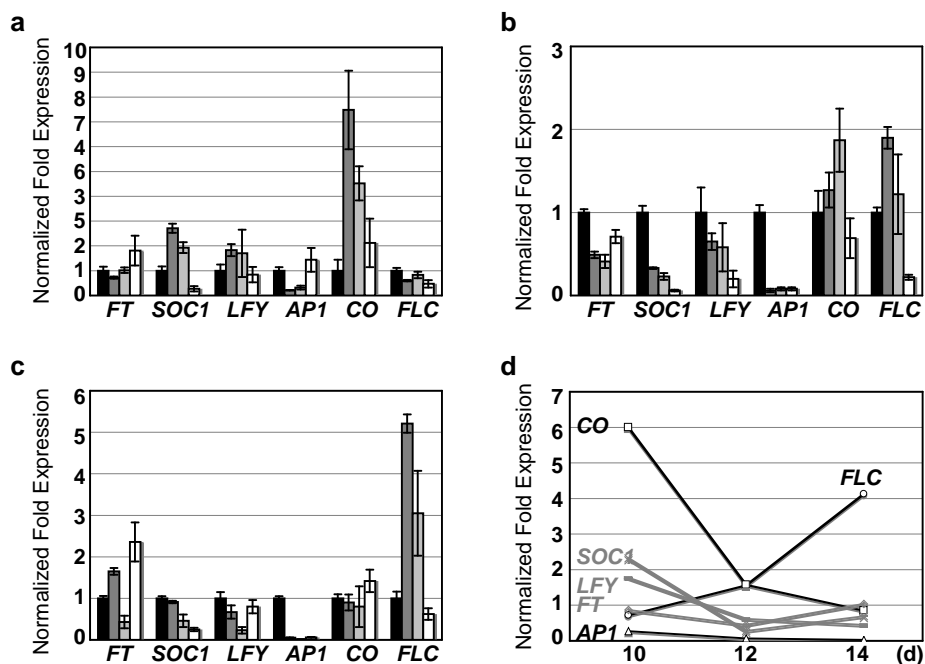

**Fig. S1** Expression analysis of MPF1's putative target genes in *35S:MPF1* transgenic Arabidopsis lines.

(a) to (c) Plant lines were grown under long-day conditions for 10 (A), 12 (b) and 14 (c) days after germination. The columns show the data for each gene set in *35S:MPF1-1* (dark grey), *35S:MPF1-2* (light grey) as compared with wild-type Arabidopsis (black) and *soc1-3* (white), which were used as controls. The values given are average expression levels based on three independent experiments. Expression levels for each gene are normalized relative to wild type. Error bars: standard deviation.

(d) The dynamics of gene expression is indicated by the averaged transgenic lines relative to wild type at 10, 12 and 14 days.
